# Supplementary material
Source: MDPI journal article supplement (https://www.mdpi.com/1999-4907/7/12/296)
Supplement: s1 [file s1]

Supplementary Material: Increasing Water Use Efficiency Comes at a Cost for Norway Spruce

Tanja GM Sanders, Ingo Heinrich, Björn Günther and Wolfgang Beck


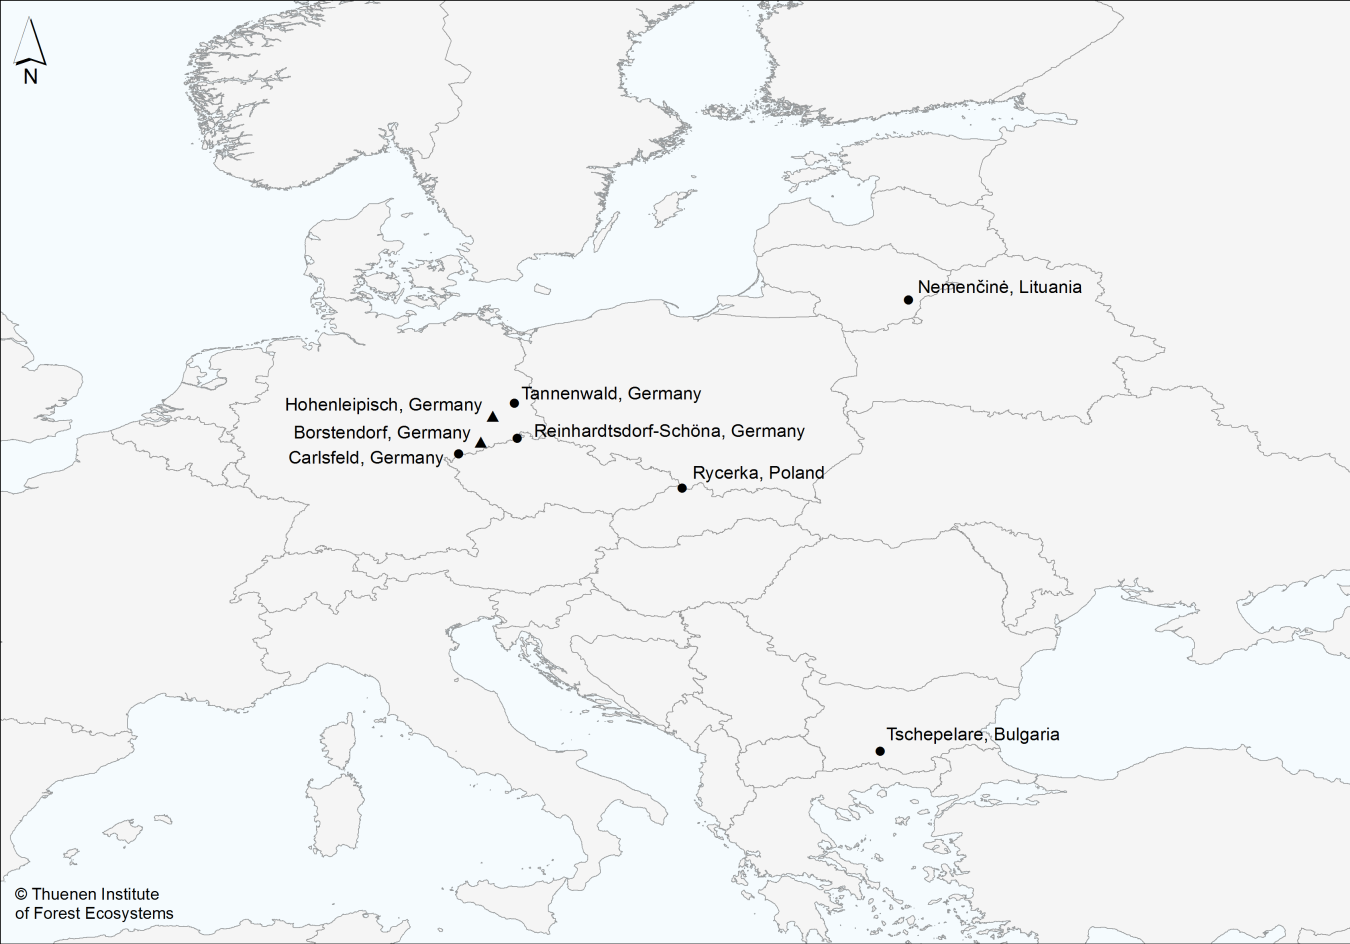


**Figure S1:** Overview of the sampling locations in Hohenleipisch and Borstendorf (triangle) as well as the source of origin of the respective provenances (filled circle).

**Table S1:** Overview of the sampling sites with the different proveniences; given are altitude, mean annual temperature, and annual precipitation at their site of origin.

| **Sampling site** | **Lat** | **Long** | **Provenience** | **Site of Origin** | **Altitude at Origin (m a.s.l.)** | **Mean Temp (°C)** | **Mean Prec (mm)** |
| --- | --- | --- | --- | --- | --- | --- | --- |
| Borstendorf | 50.74 | 13.19 | Carlsfeld | Ore mountains | 940 | 5.1 | 845 |
|  |  |  | Reinhardtsdorf | Saxonia | 230 | 7.7 | 590 |
|  |  |  | Tannenwald | Southern Brandenburg | 60 | 9.2 | 557 |
|  |  |  | Rycerka | Beskiden, Poland | 700 | 6.2 | 994 |
|  |  |  | Nemenčinė | Lituania | 120 | 6.2 | 651 |
|  |  |  | Tschepelare | Rhodopen, Bulgaria | 1000 | 7.8 | 667 |
| Hohenleipisch | 51.49 | 13.55 | Carlsfeld | Ore mountains | 940 | 5.1 | 845 |
|  |  |  | Reinhardtsdorf | Saxonia | 230 | 7.7 | 590 |
|  |  |  | Tannenwald | Southern Brandenburg | 60 | 9.2 | 557 |
|  |  |  | Rycerka | Beskiden, Poland | 700 | 6.2 | 994 |
|  |  |  | Nemenčinė | Lituania | 120 | 6.2 | 651 |
|  |  |  | Tschepelare | Rhodopen, Bulgaria | 1000 | 7.8 | 667 |


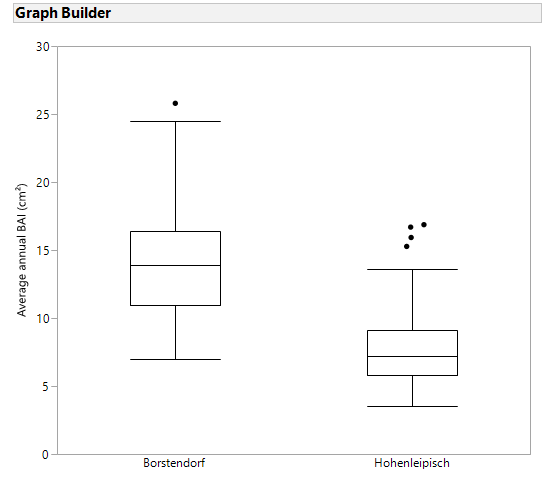


**Figure S2:** Average annual basal area increment of all sampled trees at the two sites; showing the significantly higher growth at Borstendorf.

© 2016 by the authors. Submitted for possible open access publication under the
terms and conditions of the Creative Commons Attribution (CC-BY) license (http://creativecommons.org/licenses/by/4.0/).
